# Supplementary material for: Network-based global inference of human disease genes
Source: PubMed Central journal article supplement — Mol Syst Biol. 2008 May 6;4:189. doi: 10.1038/msb.2008.27 (PMC2424293; doi:10.1038/msb.2008.27), 2008-05-06
Supplement: msb200827-s1.pdf [file msb200827-s1.pdf]

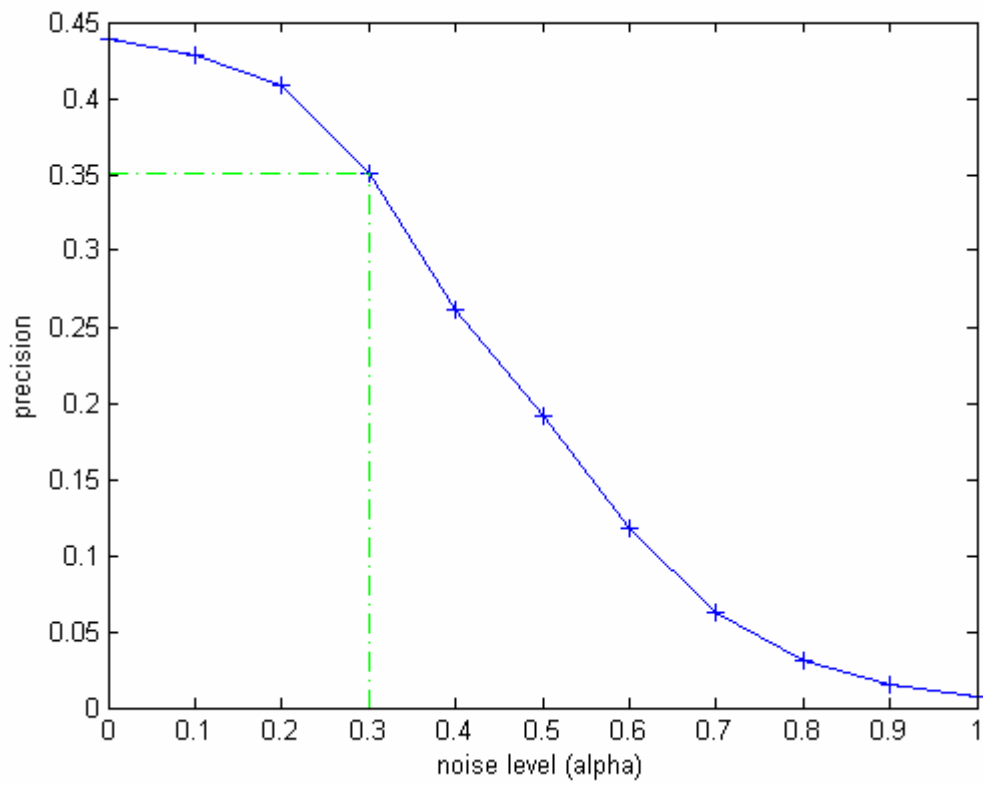

**Supplementary Figure S1.** This figure shows how the precision varies with noise level (the coefficient alpha).
